# Supplementary material for: Recombinant Expression of a Novel Fungal Immunomodulatory Protein with Human Tumor Cell Antiproliferative Activity from Nectria haematococca
Source: PubMed Central journal article supplement (PMC4227187; doi:10.3390/ijms151017751), 2014-09-30
Supplement: ijms-15-17751-s001.pdf [file ijms-15-17751-s001.pdf]

## Supplementary Information

**Table S1.** LAL (Limulus amoebocyte lysate) assay of endotoxin in rFIP-nha.

| <b>Samples</b>                    | <b>Clot</b> | <b>Results</b> |
|-----------------------------------|-------------|----------------|
| Sterile water                     | –           | negative       |
| <i>E. coli</i> CSE (0.0075 EU/mL) | –           | negative       |
| <i>E. coli</i> CSE (0.015 EU/mL)  | +           | positive       |
| <i>E. coli</i> CSE (0.03 EU/mL)   | +           | positive       |
| <i>E. coli</i> CSE (0.06 EU/mL)   | +           | positive       |
| PBS                               | –           | negative       |
| RFIP-nha (8 µg/mL)                | –           | negative       |
| RFIP-nha (16 µg/mL)               | –           | negative       |
| RFIP-nha (32 µg/mL)               | –           | negative       |

LAL assay was performed by gel-clot method in triplicate. *E. coli* Control Standard Endotoxin (CSE) were used as positive controls, and sterile water was used as a negative control. It was confirmed that the PBS and rFIP-nha samples were not diluted by endotoxin (LPS).
